# Supplementary material for: Symmetrical retrograde actin flow in the actin fusion structure is involved in osteoclast fusion
Source: Oxford University Press journal article supplement (doi:10.1242/bio.025460), 2017-07-15
Supplement: bio025460supp.pdf [file bio025460supp.pdf]

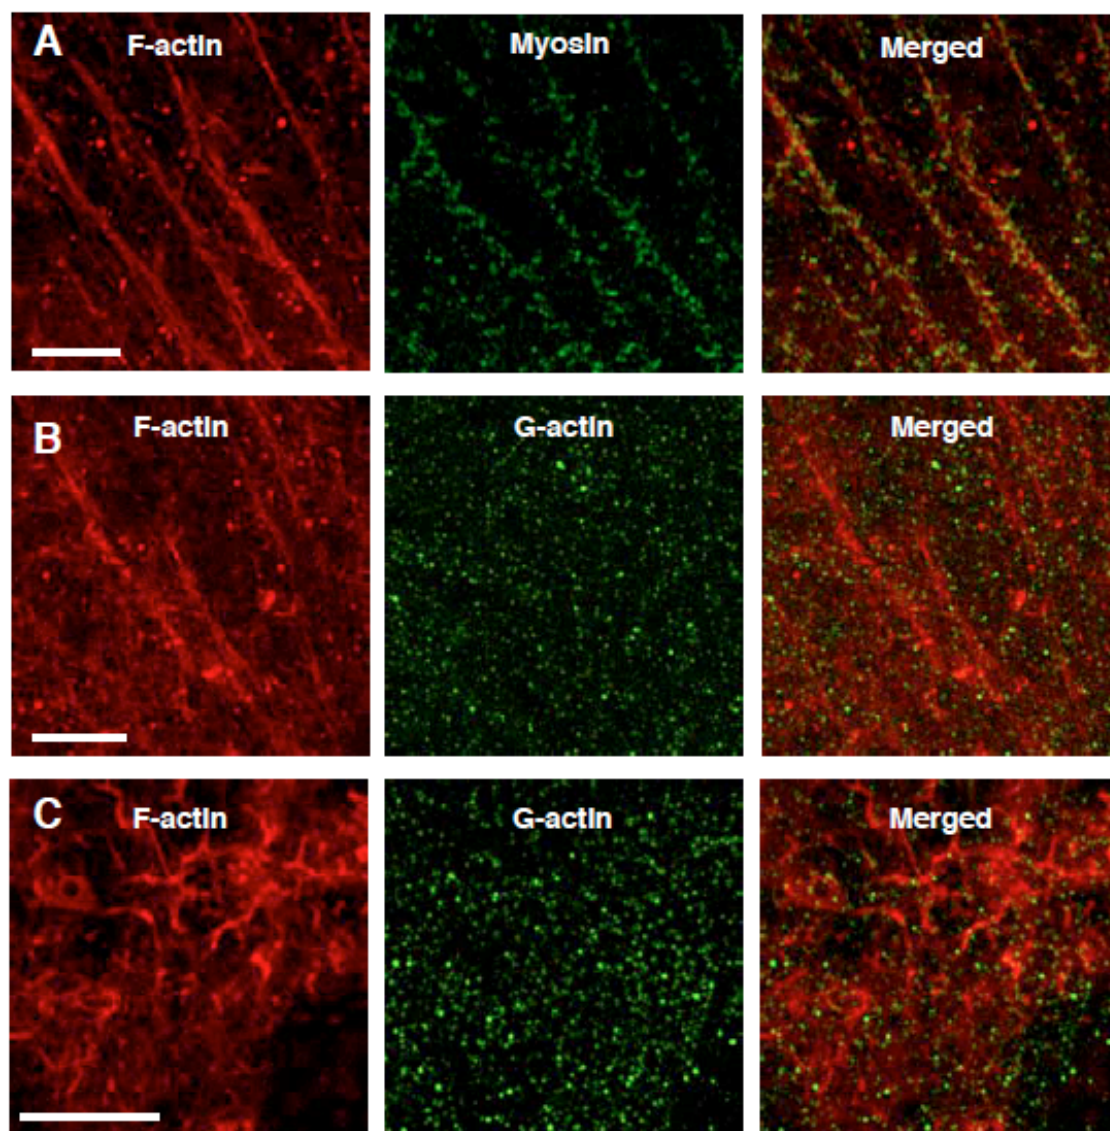

**Fig. S1: Verification of anti-G-actin antibody.**

**A:** Fixed osteoclast-like cells were stained with rhodamine-phalloidin (red) and non-muscle myosin IIA antibody (green) for N-SIM. Stress fibers were decorated with many possible dimmers of non-muscle myosin IIA. **B:** Fixed osteoclast-like cells were stained with rhodamine-phalloidin (red) and anti beta-actin antibody (green) for N-SIM. The anti-beta-actin antibody did not stain the stress fibers. **C:** Fixed osteoclast-like cells were stained with rhodamine-phalloidin (red) and anti beta-actin antibody (green) for N-SIM. The anti beta-actin antibody did not stain the microplacae. Bars, 5  $\mu\text{m}$ .

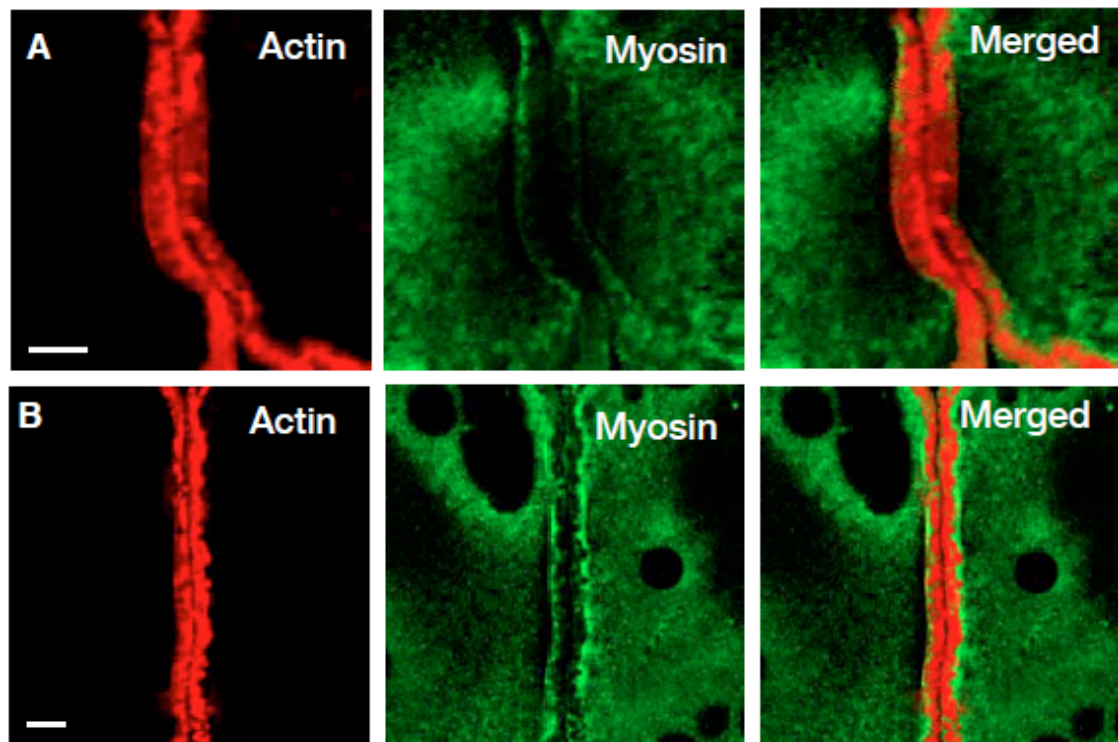

**Fig. S2: Effect of ML-7 on the ZLS.**

Osteoclastogenesis was performed in the presence and absence of 3  $\mu\text{M}$  ML-7. The fixed cells were stained with anti-nonmuscle myosin IIA (green) and rhodamine-phalloidin (red). **A:** Confocal image of the ZLS. Control. **B:** Confocal image of the ZLS treated with 3  $\mu\text{M}$  ML-7. Bars, 10  $\mu\text{m}$ .

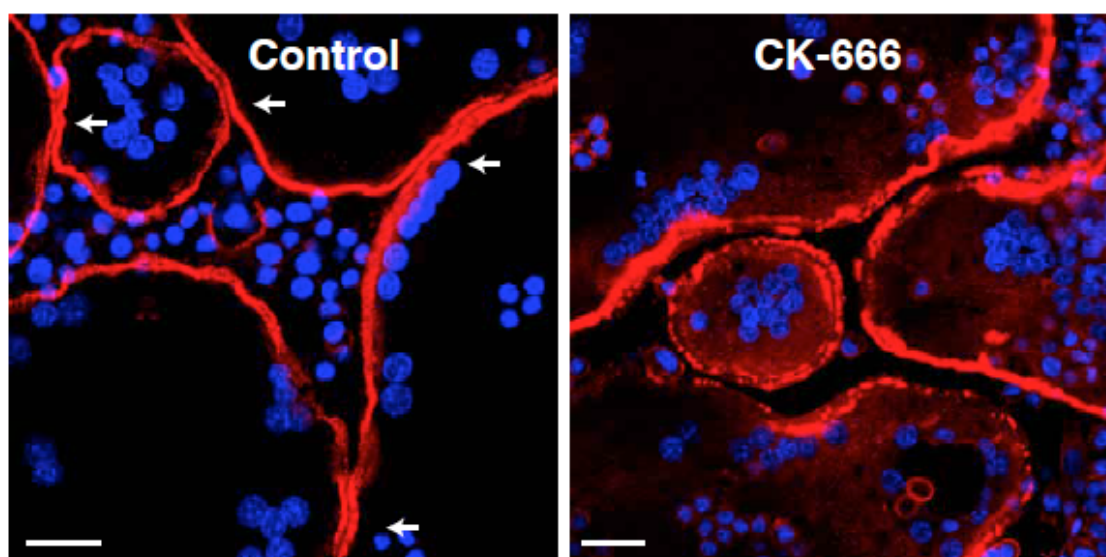

**Fig. S3: Effect of CK-666 on the cell-cell interaction of multinucleated cells.**

OCLs were incubated with 100  $\mu$ M CK-666 for 40 min. The cells were fixed and stained with rhodamine-phalloidin and DAPI for confocal microscopy. Arrows indicate the ZLS. Note the disruption of the ZLS and the detachment of two osteoclasts in the presence of 100  $\mu$ M CK-666. F-actin shown in red and the nucleus in blue. Bars, 20  $\mu$ m.

## Movies

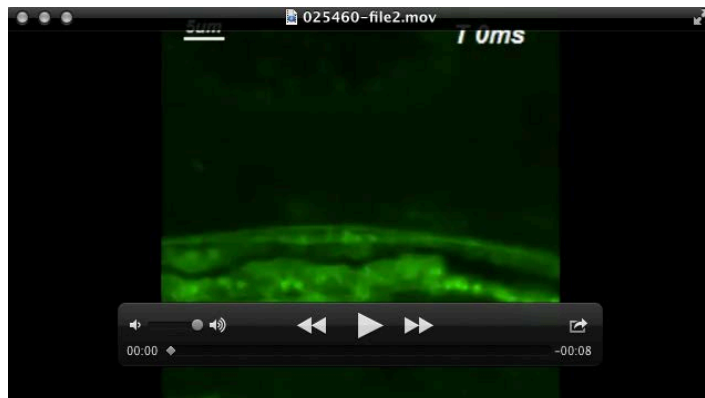

### Movie 1

Actin dynamics in the ZLS. RAW 264.7 cells transfected with EGFP-actin. EGFP fluorescence was acquired every 4 sec by an Olympus FV10i. Corresponds to Fig. 1A.

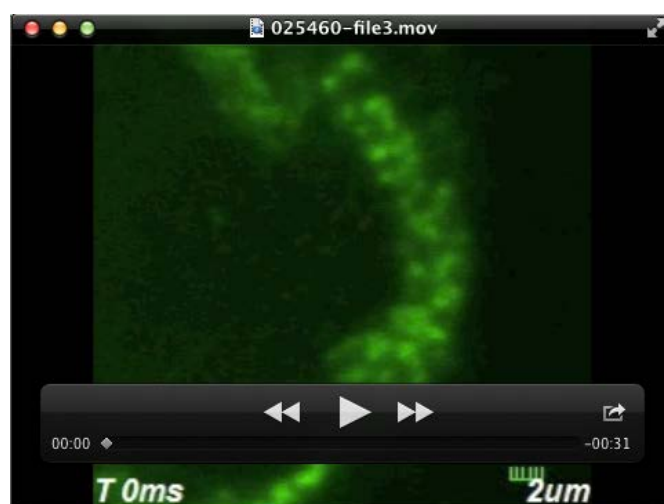

### Movie 2

Actin dynamics in the podosome belt. RAW 264.7 cells transfected with EGFP-actin. EGFP fluorescence was acquired every 4 sec by an Olympus FV10i. Corresponds to Fig. 1B.

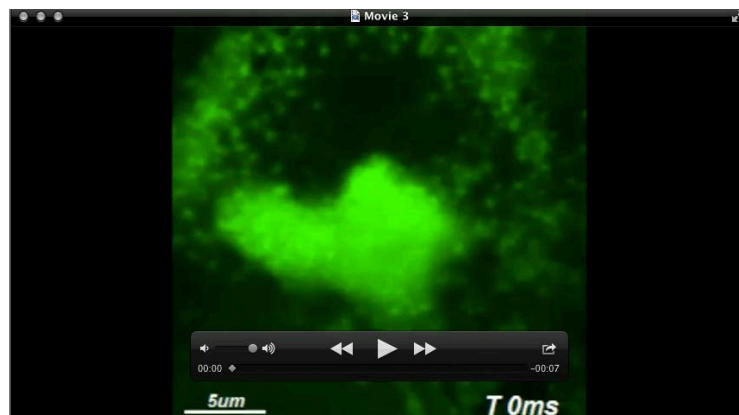

### Movie 3

Actin dynamics in the podosome ring. RAW 264.7 cells transfected with EGFP-actin. EGFP fluorescence was acquired every 4 sec by an Olympus FV10i. Corresponds to Fig. 1C.

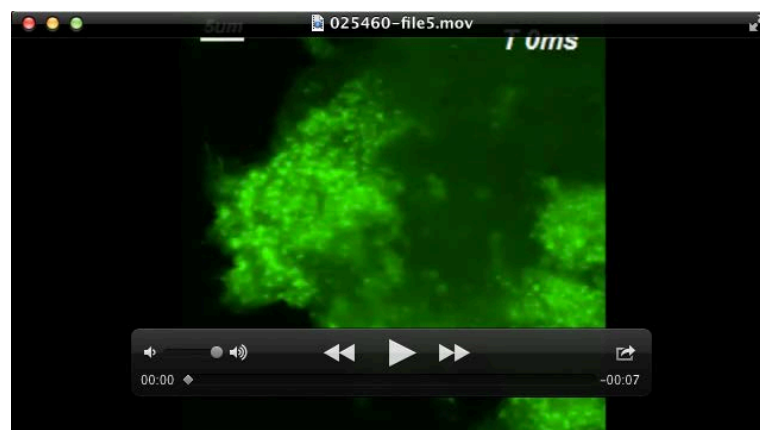

### Movie 4

Actin movement in the podosome cluster. The actin clouds spontaneously moved in the podosome cluster. RAW 264.7 cells transfected with EGFP-actin. EGFP fluorescence was acquired every 4 sec by an Olympus FV10i. Corresponds to Figure 1D.



**Table S1**

Dimensions of the podosomal proteins in the zipper-like structure

| Component protein     | Width ( $\mu\text{m}$ ) | N  |
|-----------------------|-------------------------|----|
| F-actin               | $3.52 \pm 1.22$         | 65 |
| Non-muscle myosin IIA | $1.18 \pm 0.41$         | 45 |
| Cortactin             | $3.31 \pm 0.96$         | 17 |
| Vinculin              | $1.55 \pm 0.87$         | 25 |
| Paxillin              | $1.62 \pm 0.73$         | 17 |
| Zxyin                 | $0.66 \pm 0.43$         | 11 |

The widths of the podosomal component proteins in the half of the zipper-like structure were determined from the projected confocal images. Details are described in Materials and Methods. Width is expressed in the average  $\pm$  SD. N indicates the number of osteoclasts measured. Corresponds to Figure 4E.
